# Supplementary material for: Cyclometalated Ru(ii)–NHC complexes with phenanthroline ligands induce apoptosis mediated by mitochondria and endoplasmic reticulum stress in cancer cells
Source: Royal Society of Chemistry journal article supplement (doi:10.1039/d2dt03405k), 2022-12-26
Supplement: d2dt03405k1.pdf [file d2dt03405k1.pdf]

## Electronic Supplementary Information (ESI)

# Cyclometalated Ru(II)-NHC Complexes with Phenanthroline Ligand Induce Apoptosis Mediated by Mitochondria and Endoplasmic Reticulum Stress in Cancer Cells

Chao Chen,<sup>\*a,b</sup> He Lv,<sup>b</sup> Hao Xu,<sup>a</sup> Dancheng Zhu,<sup>a</sup> and Chao Shen<sup>\*a</sup>

<sup>a</sup> Key Laboratory of Pollution Exposure and Health Intervention of Zhejiang Province, College of Biology and Environmental Engineering, Zhejiang Shuren University, Hangzhou 310015, China. E-mail: chenczju@163.com.

<sup>b</sup> College of Life Sciences, Huzhou University, Huzhou, 313000, PR China.

|                                                                                                                  |         |
|------------------------------------------------------------------------------------------------------------------|---------|
| A. ORTEP drawing of <b>Ru1-Ru4</b> and selected bond lengths and angles.....                                     | S2-S3   |
| B. Table S1. X-ray Crystallographic data of <b>Ru1-Ru4</b> .....                                                 | S4      |
| C. Fig.S1. UV-vis spectra and emission spectra of <b>Ru1-Ru4</b> in CH <sub>3</sub> CN.....                      | S5      |
| D. Fig.S2. MTT curves of <b>Ru1 -Ru4</b> , <i>cis-Pt</i> , and HL·PF <sub>6</sub> gainst cancer cells .....      | S5      |
| E. Cell experiment.....                                                                                          | S6-S8   |
| F. Fig.S6. log p <sub>o/w</sub> of <b>Ru1-Ru4</b> and intracellular accumulation of Ruthenium in HeLa cells..... | S8      |
| G. UV-vis spectra change of <b>Ru1-Ru4</b> in 1640 medium.....                                                   | S9      |
| H. <sup>1</sup> H and <sup>13</sup> C NMR Spectrum of <b>Ru1-Ru4</b> .....                                       | S10-S15 |

A. ORTEP drawing of **Ru1-Ru4** and selected bond lengths and angles.

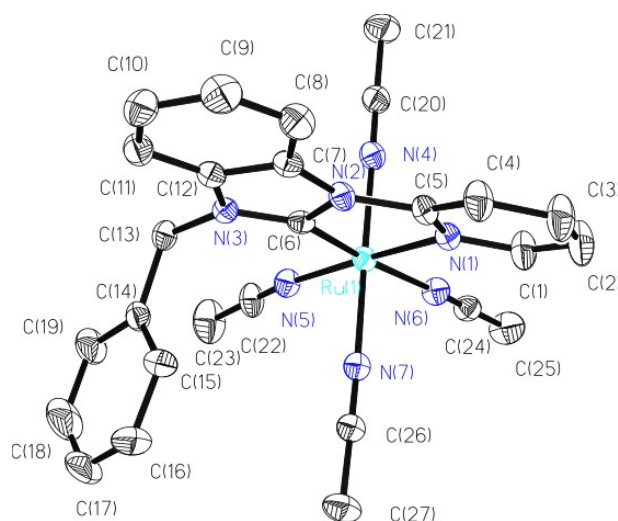

ORTEP drawing of **Ru1** showing atomic numbering scheme at 50% probability ellipsoids. Selected bond lengths (Å) and angles(deg): Ru(1)-C(6) 1.993(5), Ru(1)-N(7) 2.041(4), Ru(1)-N(4) 2.049(5), Ru(1)-N(5) 2.057(5), Ru(1)-N(1) 2.075(4), Ru(1)-N(6) 2.152(5), C(6)-Ru(1)-N(7) 89.97(17), C(6)-Ru(1)-N(4) 90.63(17), N(7)-Ru(1)-N(4) 179.37(15), C(6)-Ru(1)-N(5) 101.20(17), N(7)-Ru(1)-N(5) 88.61(15), N(4)-Ru(1)-N(5) 91.49(16), C(6)-Ru(1)-N(1) 78.27(16), N(7)-Ru(1)-N(1) 89.21(14), N(4)-Ru(1)-N(1) 90.70(15), N(5)-Ru(1)-N(1) 177.76(16), C(6)-Ru(1)-N(6) 174.30(17), N(7)-Ru(1)-N(6) 91.19(17), N(4)-Ru(1)-N(6) 88.20(17), N(5)-Ru(1)-N(6) 84.42(15), N(1)-Ru(1)-N(6) 96.15(15).

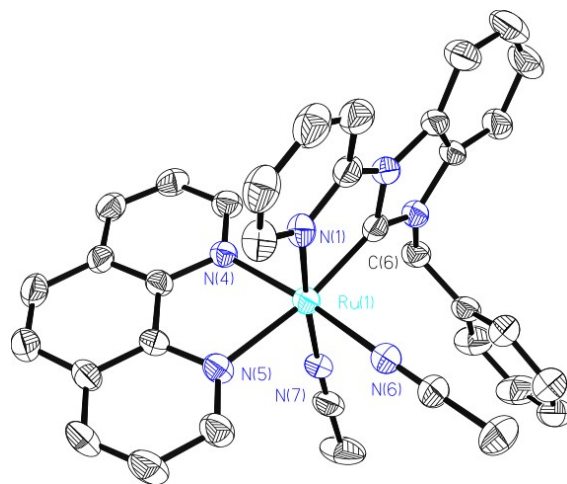

ORTEP drawing of **Ru2** showing atomic numbering scheme at 50% probability ellipsoids. Selected bond lengths (Å) and angles(deg): Ru(1)-C(6) 1.975(5), Ru(1)-N(7) 2.028(5), Ru(1)-N(6) 2.041(5), Ru(1)-N(1) 2.053(4), Ru(1)-N(4) 2.063(4), Ru(1)-N(5) 2.141(4), C(6)-Ru(1)-N(7) 99.88(19), C(6)-Ru(1)-N(6) 90.53(19), N(7)-Ru(1)-N(6) 88.16(18), C(6)-Ru(1)-N(1) 78.5(2), N(7)-Ru(1)-N(1) 175.35(16), N(6)-Ru(1)-N(1) 87.51(18), C(6)-Ru(1)-N(4) 95.44(18), N(7)-Ru(1)-N(4) 90.70(17), N(6)-Ru(1)-N(4) 174.03(17), N(1)-Ru(1)-N(4) 93.78(16), C(6)-Ru(1)-N(5) 170.61(19), N(7)-Ru(1)-N(5) 87.69(17), N(6)-Ru(1)-N(5) 95.29(17), N(1)-Ru(1)-N(5) 94.40(17), N(4)-Ru(1)-N(5) 78.81(16).

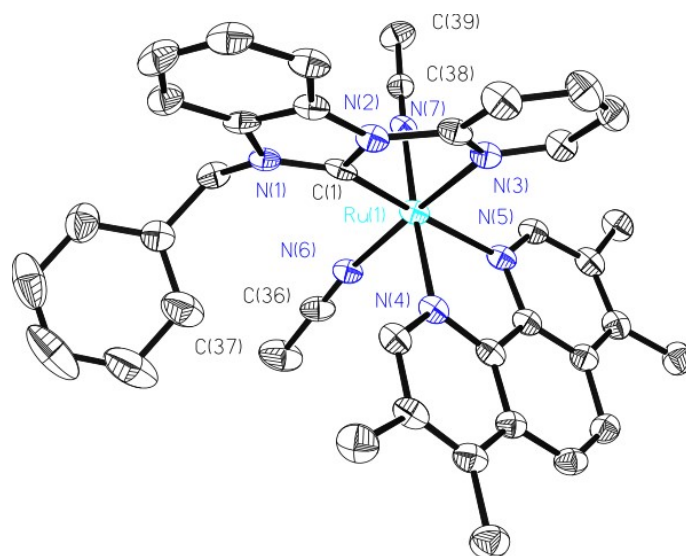

Fig. S3. ORTEP drawing of **Ru3** showing atomic numbering scheme at 50% probability ellipsoids. Selected bond lengths (Å) and angles(deg): Ru(1)-C(1) 1.977(4), Ru(1)-N(7) 2.038(4), Ru(1)-N(6) 2.039(4), Ru(1)-N(4) 2.055(4), Ru(1)-N(3) 2.062(3), Ru(1)-N(5) 2.134(4), C(1)-Ru(1)-N(7) 92.76(15), C(1)-Ru(1)-N(6) 100.25(16), N(7)-Ru(1)-N(6) 90.48(14), C(1)-Ru(1)-N(4) 94.55(15), N(7)-Ru(1)-N(4) 172.59(13), N(6)-Ru(1)-N(4) 87.01(14), C(1)-Ru(1)-N(3) 78.39(16), N(7)-Ru(1)-N(3) 94.47(14), N(6)-Ru(1)-N(3) 174.91(14), N(4)-Ru(1)-N(3) 88.20(14), C(1)-Ru(1)-N(5) 169.20(16), N(7)-Ru(1)-N(5) 94.16(13), N(6)-Ru(1)-N(5) 87.98(14), N(4)-Ru(1)-N(5) 78.79(14), N(3)-Ru(1)-N(5) 92.79(14).

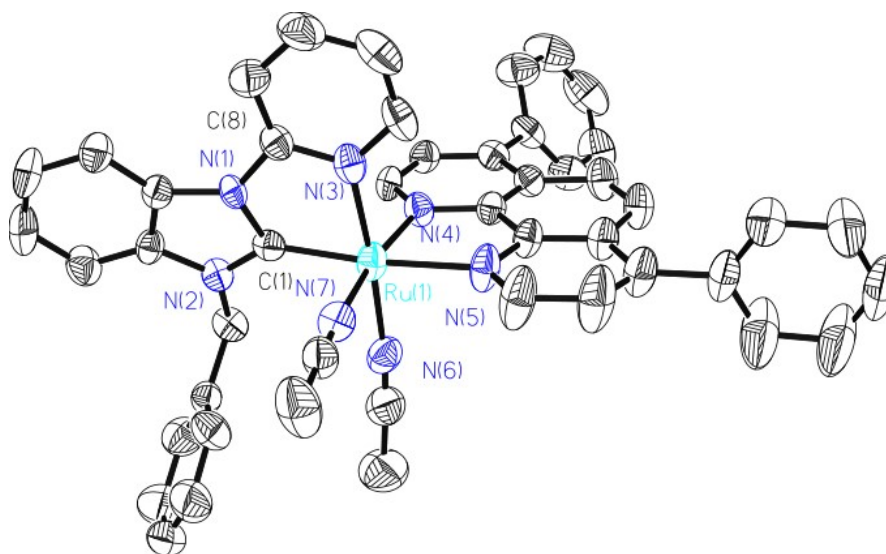

Fig. S4. ORTEP drawing of **Ru4** showing atomic numbering scheme at 50% probability ellipsoids. Selected bond lengths (Å) and angles(deg): Ru(1)-C(1) 1.983(6), Ru(1)-N(6) 2.035(6), Ru(1)-N(7) 2.042(6), Ru(1)-N(4) 2.056(5), Ru(1)-N(3) 2.078(5), Ru(1)-N(5) 2.129(5), C(1)-Ru(1)-N(6) 97.6(2), C(1)-Ru(1)-N(7) 88.1(2), N(6)-Ru(1)-N(7) 88.8(2), C(1)-Ru(1)-N(4) 100.1(2), N(6)-Ru(1)-N(4) 89.8(2), N(7)-Ru(1)-N(4) 171.84(19), C(1)-Ru(1)-N(3) 78.7(2), N(6)-Ru(1)-N(3) 175.5(2), N(7)-Ru(1)-N(3) 88.6(2), N(4)-Ru(1)-N(3) 93.34(19), C(1)-Ru(1)-N(5) 173.9(2), N(6)-Ru(1)-N(5) 88.4(2), N(7)-Ru(1)-N(5) 93.0(2), N(4)-Ru(1)-N(5) 78.91(18), N(3)-Ru(1)-N(5) 95.4(2).

**B. Table S1. X-ray crystallographic data of Ru1-Ru4.**

|                                                                                | <b>Ru1</b>                                                                           | <b>Ru2</b>                                                                           | <b>Ru3</b>                                                                           | <b>Ru4</b>                                                                           |
|--------------------------------------------------------------------------------|--------------------------------------------------------------------------------------|--------------------------------------------------------------------------------------|--------------------------------------------------------------------------------------|--------------------------------------------------------------------------------------|
| formula                                                                        | C <sub>29</sub> H <sub>30</sub> F <sub>12</sub> N <sub>8</sub> P <sub>2</sub> R<br>u | C <sub>35</sub> H <sub>29</sub> F <sub>12</sub> N <sub>7</sub> P <sub>2</sub> R<br>u | C <sub>39</sub> H <sub>37</sub> F <sub>12</sub> N <sub>7</sub> P <sub>2</sub> R<br>u | C <sub>47</sub> H <sub>37</sub> F <sub>12</sub> N <sub>7</sub> P <sub>2</sub> R<br>u |
| <i>Fw.</i>                                                                     | 881.62                                                                               | 938.66                                                                               | 994.77                                                                               | 1090.85                                                                              |
| crystal system                                                                 | Monoclinic                                                                           | Monoclinic                                                                           | Triclinic                                                                            | Triclinic                                                                            |
| space group                                                                    | <i>P2(1)/c</i>                                                                       | <i>P2(1)/c</i>                                                                       | <i>P-1</i>                                                                           | <i>P-1</i>                                                                           |
| <i>a</i> /Å                                                                    | 10.494(7)                                                                            | 17.9763(9)                                                                           | 11.7572(16)                                                                          | 11.1717(6)                                                                           |
| <i>b</i> /Å                                                                    | 15.943(10)                                                                           | 11.8371(6)                                                                           | 13.3532(18)                                                                          | 12.5812(7)                                                                           |
| <i>c</i> /Å                                                                    | 22.151(15)                                                                           | 18.6576(12)                                                                          | 15.822(2)                                                                            | 18.4997(6)                                                                           |
| $\beta$ /deg                                                                   | 92.845(12)                                                                           | 107.175(6)                                                                           | 70.759(2)                                                                            | 93.676(3)                                                                            |
| <i>V</i> /Å <sup>3</sup>                                                       | 3701(4)                                                                              | 3793.1(4)                                                                            | 2334.6(5)                                                                            | 2454.0(2)                                                                            |
| <i>Z</i>                                                                       | 4                                                                                    | 4                                                                                    | 2                                                                                    | 2                                                                                    |
| <i>D</i> <sub>calcd.</sub> Mg/m <sup>3</sup>                                   | 1.582                                                                                | 1.644                                                                                | 1.415                                                                                | 1.476                                                                                |
| Refls collected                                                                | 18573                                                                                | 17302                                                                                | 29121                                                                                | 31388                                                                                |
| Independent reflections, <i>R</i> <sub>int</sub>                               | 6519, 0.0569                                                                         | 6677, 0.0520                                                                         | 8163, 0.0171                                                                         | 8632, 0.0861                                                                         |
| Goodness-of-fit on <i>F</i> <sup>2</sup>                                       | 1.069                                                                                | 1.056                                                                                | 1.042                                                                                | 1.051                                                                                |
| <i>R</i> <sub>1</sub> , <i>wR</i> <sub>2</sub><br>[ <i>I</i> > 2σ( <i>I</i> )] | 0.0495, 0.1316                                                                       | 0.0596, 0.1501                                                                       | 0.0557, 0.1448                                                                       | 0.0710, 0.1859                                                                       |
| <i>R</i> <sub>1</sub> , <i>wR</i> <sub>2</sub><br>(all data)                   | 0.0758, 0.1615                                                                       | 0.0864, 0.1797                                                                       | 0.0656, 0.1511                                                                       | 0.1119, 0.2117                                                                       |
| Largest diff. peak and hole (e. Å <sup>-3</sup> )                              | 0.847 and -0.657                                                                     | 0.759 and -0.708                                                                     | 1.274 and -1.030                                                                     | 0.937 and -0.533                                                                     |

### C. UV-vis spectra and emission spectra of Ru1-Ru4 in CH<sub>3</sub>CN

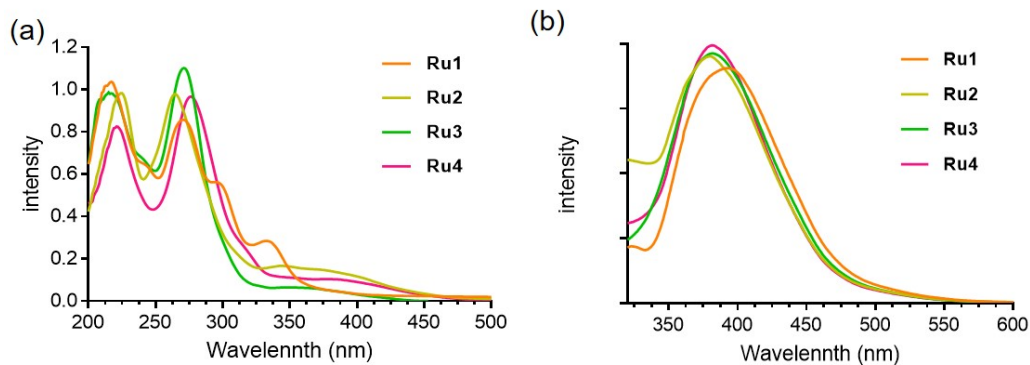

FigS1. (a) UV-vis spectra of **Ru1-Ru4** in  $\text{CH}_3\text{CN}$ . (b) Room-temperature emission spectra of **Ru1-Ru4** in  $\text{CH}_3\text{CN}$  ( excitation wavelength at 300 nm).

#### D. MTT curves of **Ru1-Ru4**, *cis*-Pt, and HL·PF<sub>6</sub> against cancer cells

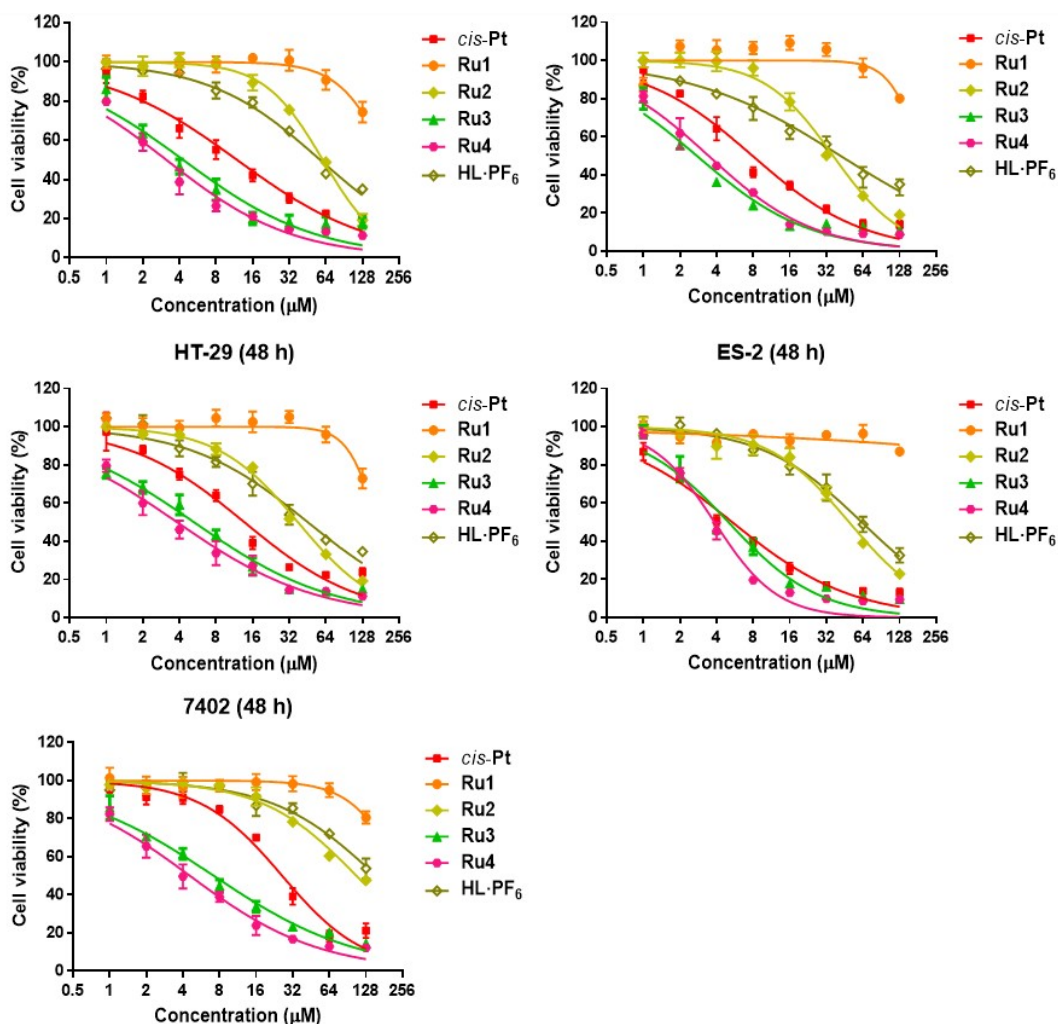

Fig.S2 The *in vitro* cytotoxic activities of **Ru1-Ru4**, *cis*-Pt, and HL·PF<sub>6</sub> against cancer cells

#### E. Cell experiment

Cells were cultured in 1640 medium containing 10% fetal bovine serum (FBS) and 1% antibiotics (penicillin), and were maintained in a humid atmosphere at 37 °C with 5% CO<sub>2</sub>. Drug solution preparation: **Ru1-Ru4** were first dissolved in DMSO to form a 32 mM solution. Then take 4 μL of the solution and dilute it in 1 ml of 1640 medium to obtain a drug solution of 128 μM. The concentrations of 64 μM, 32 μM, 16 μM, 8 μM, 4 μM, 2 μM and 1 μM were obtained by multiple dilution.

### **MTT viability assay**

The *in vitro* cytotoxicity of the **Ru1-Ru4** complexes and cisplatin were measured by an MTT (3-(4,5-dimethylthiazol-2-yl)-2,5-diphenyltetrazolium bromide) assay. The cells were plated in 96-well plates (4000-5000 cells per well) and incubated at 37 °C overnight. Then, cells were treated with a serial dilution of **Ru1-Ru4** and cisplatin in various concentrations for an additional 48 h. Following exposure, 30 μL MTT solution (5 mg/mL in PBS) was added to each well. The MTT solution was removed from the wells after 4 h and the purple MTT-formazan crystals were then dissolved by the addition of DMSO (100 μL). The absorbance in each well was measured at 490 nm using a microplate reader (Multiskan FC, Thermo Scientific).

### **Cell proliferation as determined by EdU incorporation**

HeLa cells were plated in 48-well plates ( $2 \times 10^4$  cells per well) and incubated at 37 °C overnight. Then, **Ru1-Ru4** and cisplatin (4 μM) were added to the cells and then incubated for 24 h at 37 °C. DNA synthesis was quantified at the end of the drug treatment using a Click-iT EdU Alexa Fluor 488 Assay Kit (Invitrogen) according to the manufacturer's protocol. Finally, the cells were imaged by fluorescence microscopy (Olympus, IX72, Japan),  $n \geq 5$  regions with 1500-2000 total cells were counted to assess the presence of cell proliferation

### **Wound healing assay**

HUVEC cells were seeded into 6-well plates and reached 90% confluence after 24 h of incubation at 37 °C. A pipette tip (200 μL) was used to make a line across the cell monolayer. After washing with PBS, cells were cultured in serum-free culture medium containing **Ru3, Ru4** and cisplatin (4 μM). Images of wounds were acquired by optical microscopy (Olympus, IX72, Japan) at 0 and 24 h of the incubation. The migration ratio (%) = change in width value of each group at each time / average width

of initial wound  $\times 100\%$ .

### **Measurement of mitochondrial membrane potential**

HeLa cells were seeded in 6-well plates ( $2 \times 10^5$  cells/well) overnight. After 12 h of treatment with **Ru3**, **Ru4**, or cisplatin ( $4 \mu\text{M}$ ), the cells were incubated with  $5 \mu\text{M}$  of 5,5,6,6-tetrachloro-1,1,3,3-tetraethylbenzimidazolylcarbocyanine iodide (JC-1) for another 30 min. After incubation, the cells were washed twice with prewarmed PBS, harvested, and analyzed with a flow cytometer (Cytoflex, Beckman Coulter, American). The JC-1 fluorescence data were recorded and analyzed with the CytExpert software. A parallel batch of treated cells was stained with JC-1 and washed with PBS before visualization under a fluorescence microscope (Olympus, IX72, Japan).

### **Intracellular Reactive Oxygen Species (ROS) detection**

For this assay, HeLa cells were seeded in a 6-well plate ( $2 \times 10^5$  cells/well). After 12 h of growth, the cells were treated with **Ru3**, **Ru4**, or cisplatin ( $4 \mu\text{M}$ ) for 12 h, harvested, and washed twice with PBS. Then, the cells were resuspended in 1 mL of 1640 solution with  $5 \mu\text{M}$  DCFH-DA and incubated for 30 min at  $37^\circ\text{C}$ . After incubation, the samples were washed with PBS and analyzed for DCF fluorescence in a flow cytometer (Cytoflex, Beckman Coulter, American) at an excitation wavelength of 488 nm and an emission wavelength of 525 nm. The fluorescence data were recorded and analyzed with the CytExpert software with  $1 \times 10^4$  cells in each sample. ROS generation was expressed in terms of the percentage of cells with DCF (green) fluorescence.

### **Apoptosis analysis by flow cytometry**

HeLa cells were seeded at a density of  $1 \times 10^6$  cells in each well and allowed to grow overnight at  $37^\circ\text{C}$ . Then, the cells were incubated with **Ru3**, **Ru4** and cisplatin ( $4 \mu\text{M}$ ) for another 24 h. The untreated cells were used as the control. After drug treatment, cells were centrifuged and washed with cold PBS repeatedly. The cell apoptosis analysis was determined by an Alexa Fluor 488 annexin V/PI apoptosis detection kit according to the manufacturer's protocol. Briefly, cells ( $1 \times 10^5$ ) were collected and resuspended in  $1 \times$  annexin V binding buffer ( $500 \mu\text{L}$ ) with  $5 \mu\text{L}$  Alexa Fluor 488 annexin V and  $1 \mu\text{L}$  PI ( $100 \mu\text{g mL}^{-1}$ ) in each sample. After incubation for 15 min,

the stained cells were subjected to flow cytometry (Cytotflex, Beckman Coulter, American), and the result was analyzed by CytExpert software.

### Western Blot Analysis

HeLa cells were recovered following treatment with **Ru3**, **Ru4** and cisplatin (24 h, 4  $\mu$ M) and lysed in RIPA Lysis Buffer (Beyotime)-containing protease inhibitor phenylmethanesulfonyl fluoride (PMSF). A bicinchoninic acid protein assay was used to determine the protein concentration. Samples with equivalent amounts of protein were separated on 10% SDS-PAGE gels and then transferred to PVDF membranes. After incubation with specific antibodies, including cleaved PARP, cleaved Caspase 3, cleaved Caspase 9, PERK, P-PERK, eIF2 $\alpha$ , p-eIF2 $\alpha$  and CHOP (Cell Signaling technology), HRP-linked secondary antibodies were added and the bands were visualized using the chemiluminescent substrate on Biorad.

### F. LogP<sub>o/w</sub> of Ru1-Ru4 and Intracellular accumulation of Ru1-Ru4 in HeLa cells

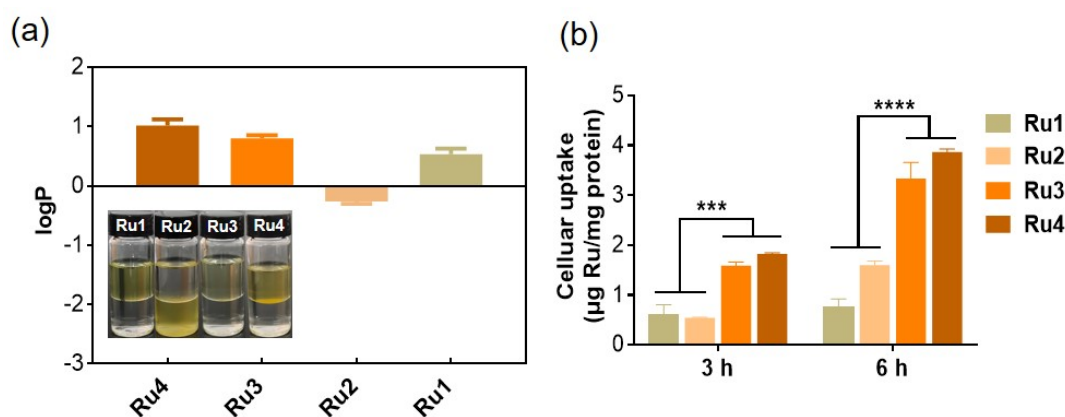

Fig.S3 (a) Lipophilicity of **Ru1-Ru4** by using oil-water distribution coefficient determination; (b) Intracellular accumulation of **Ru1-Ru4** in HeLa cells. Cells were treated with drugs at a concentration of 32  $\mu$ M.

HeLa cells were seeded in 6-well plates at a density of  $1.5 \times 10^5$  per well and incubated at 37  $^{\circ}$ C for 12 h. Then the cells were treated with cisplatin and **Ru1-Ru4** with a final concentration of 32  $\mu$ M and incubated at 37  $^{\circ}$ C for 3 h or 6 h. The cells were washed with cold PBS three times, trypsinized, and centrifuged at  $1000 \times g$  for 3 min to afford cell pellets. Subsequently, 100  $\mu$ L cell lysis buffer (pH 7.6, 25 mM Tris, 150 mM NaCl, 0.1% SDS, 1% Nonidet P-40, 1% Deoxycholic acid) containing 1% protease



inhibitor cocktail set III (Novagen) was added to each sample to obtain the cell lysis solution. 80  $\mu$ L cell lysate was diluted with 4 mL DI water and then the samples were subjected to ICP-MS for measurement of ruthenium contents. Another 20  $\mu$ L cell lysate was used to determine the protein content using bicinchoninic acid (BCA) protein assay kit (Thermo Scientific, USA)

### G. UV-vis spectra change of Ru1-Ru4 in 1640 medium

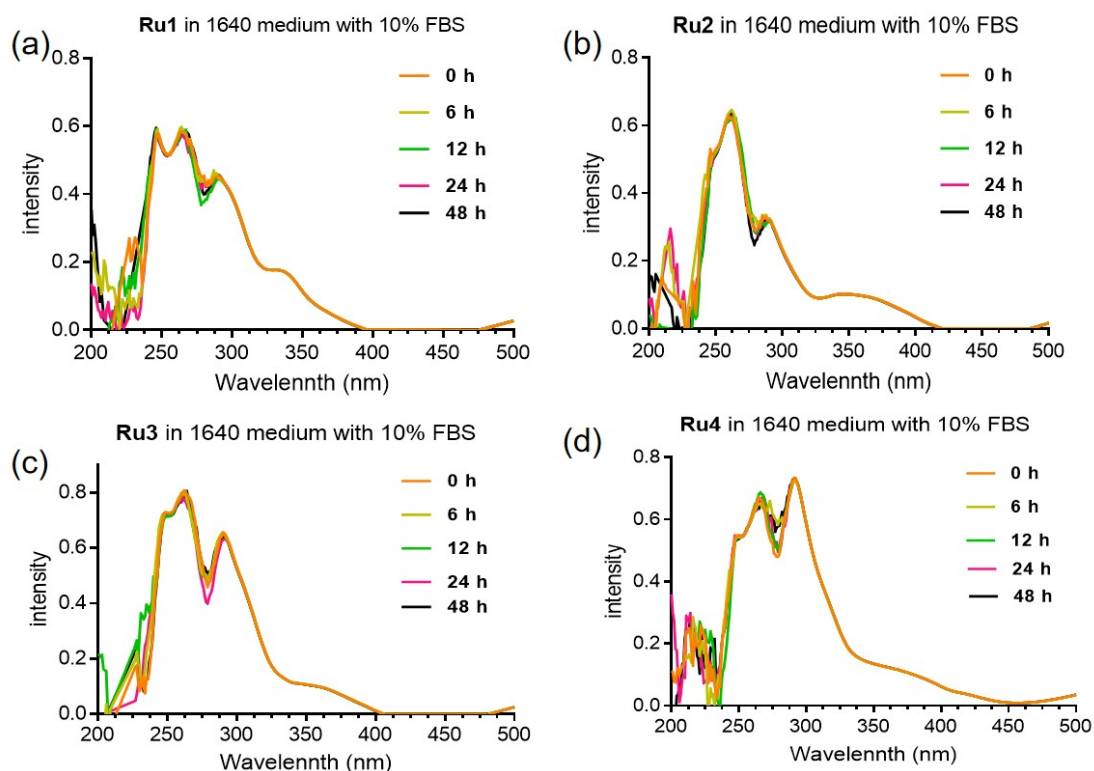

FigS4. (a) UV-vis spectra of **Ru1-Ru4** in 1640 medium with 10% FBS (v/v) after 6, 12, 24, and 48 h incubation at 37°C.

### H. $^1\text{H}$ and $^{13}\text{C}$ NMR Spectrum of Ru1-Ru4

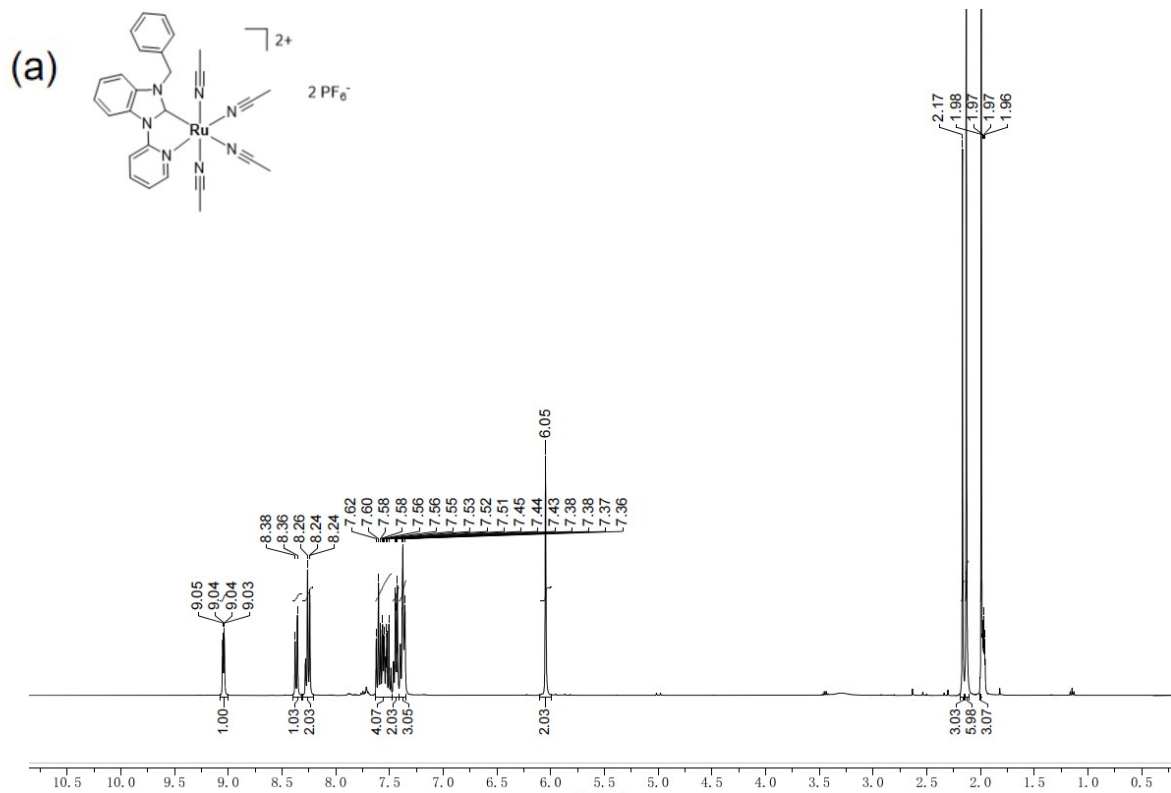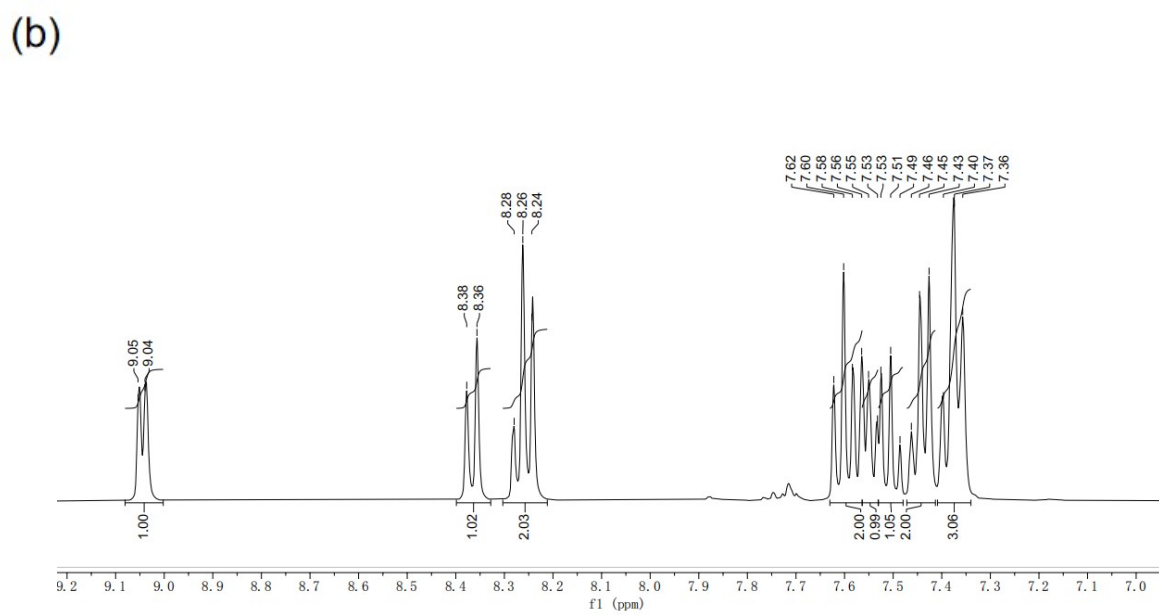

(a)  $^1\text{H NMR}$  (CD<sub>3</sub>CN) of **Ru1**, (b) aromatic region  $^1\text{H NMR}$  of **Ru1**

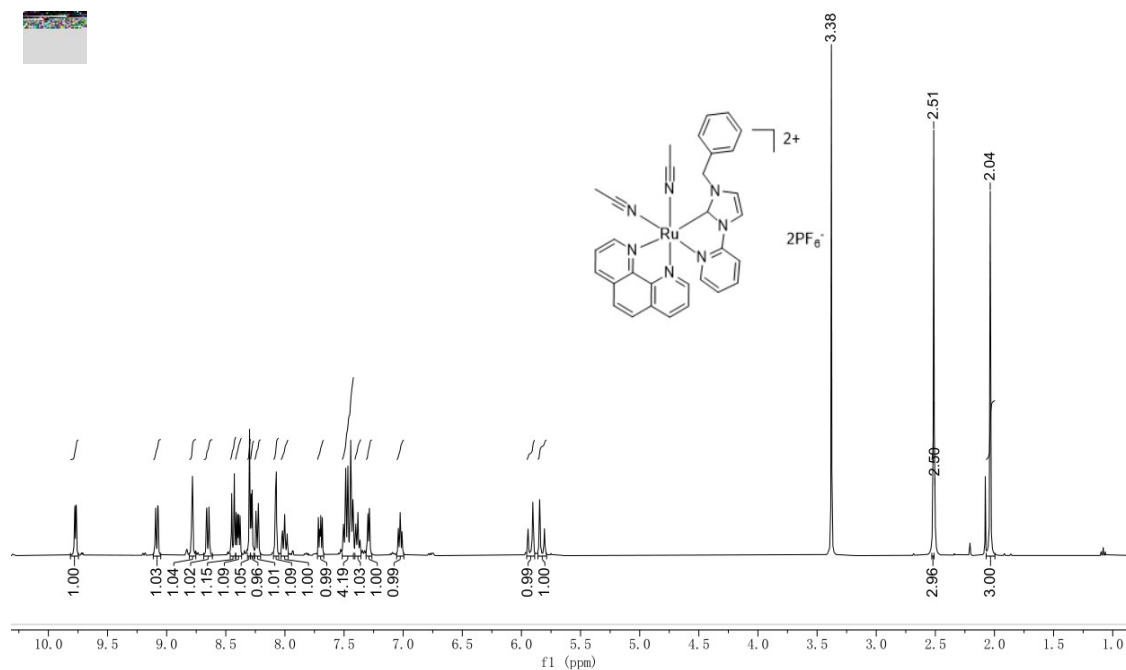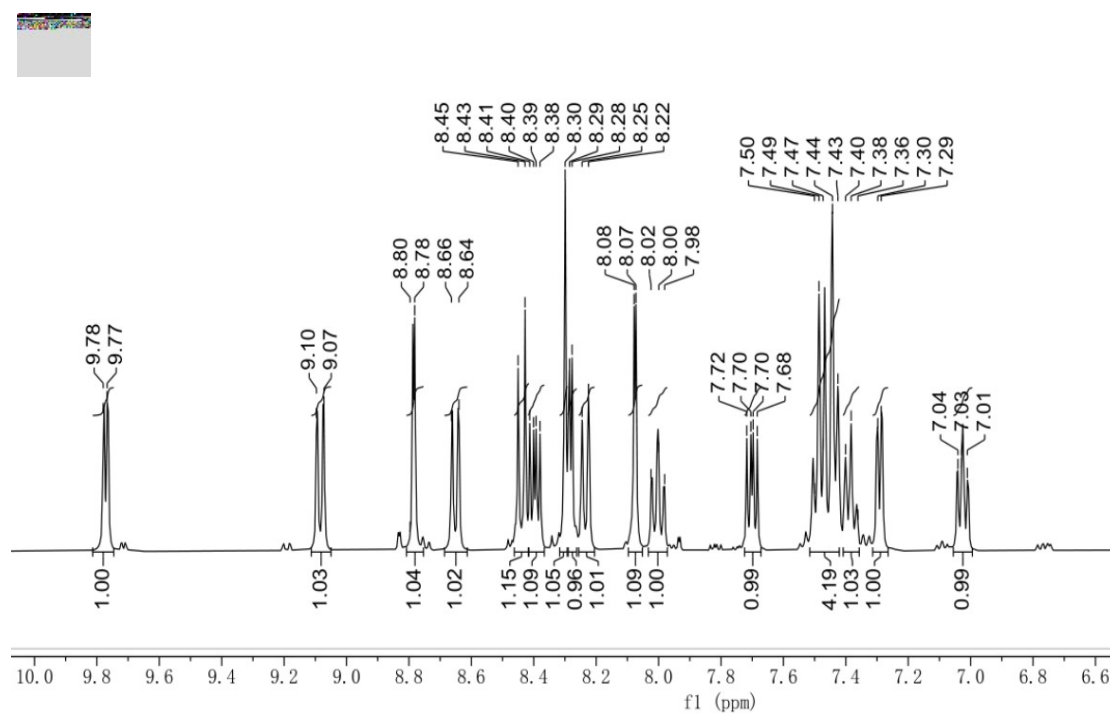

(a) <sup>1</sup>H NMR (DMSO) of **Ru2**, (b) aromatic region <sup>1</sup>H NMR of **Ru2**

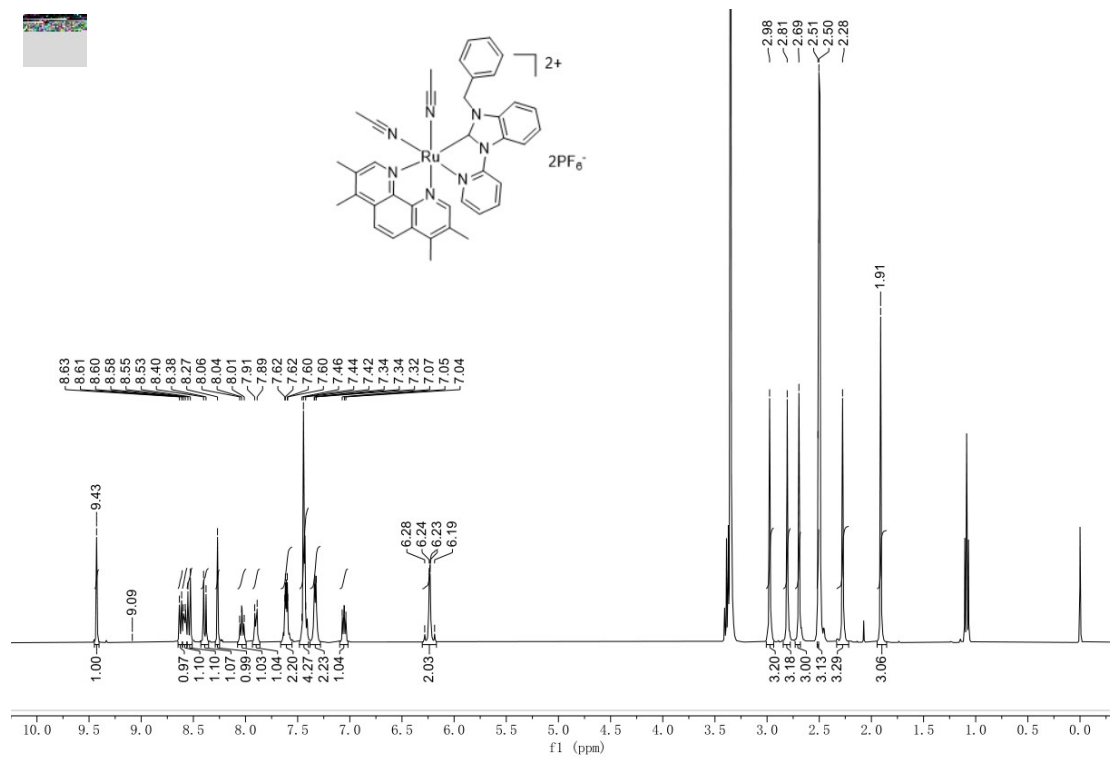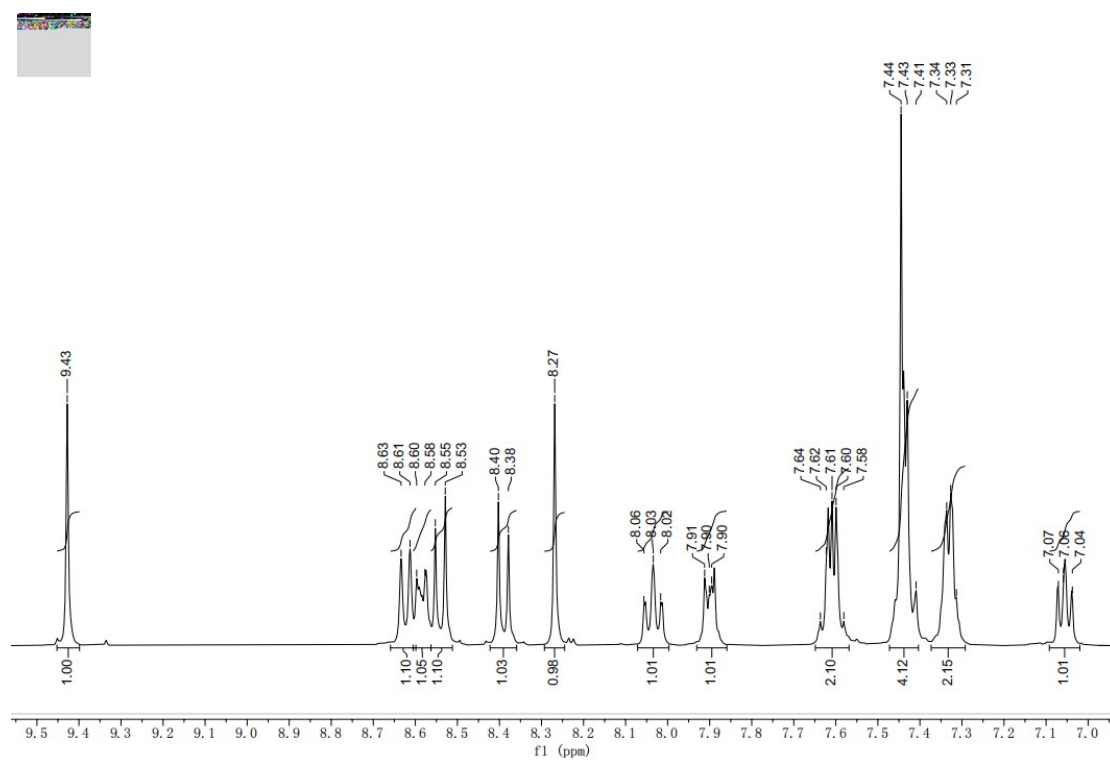

(a) <sup>1</sup>H NMR (DMSO) of **Ru3**, (b) aromatic region <sup>1</sup>H NMR of **Ru3**

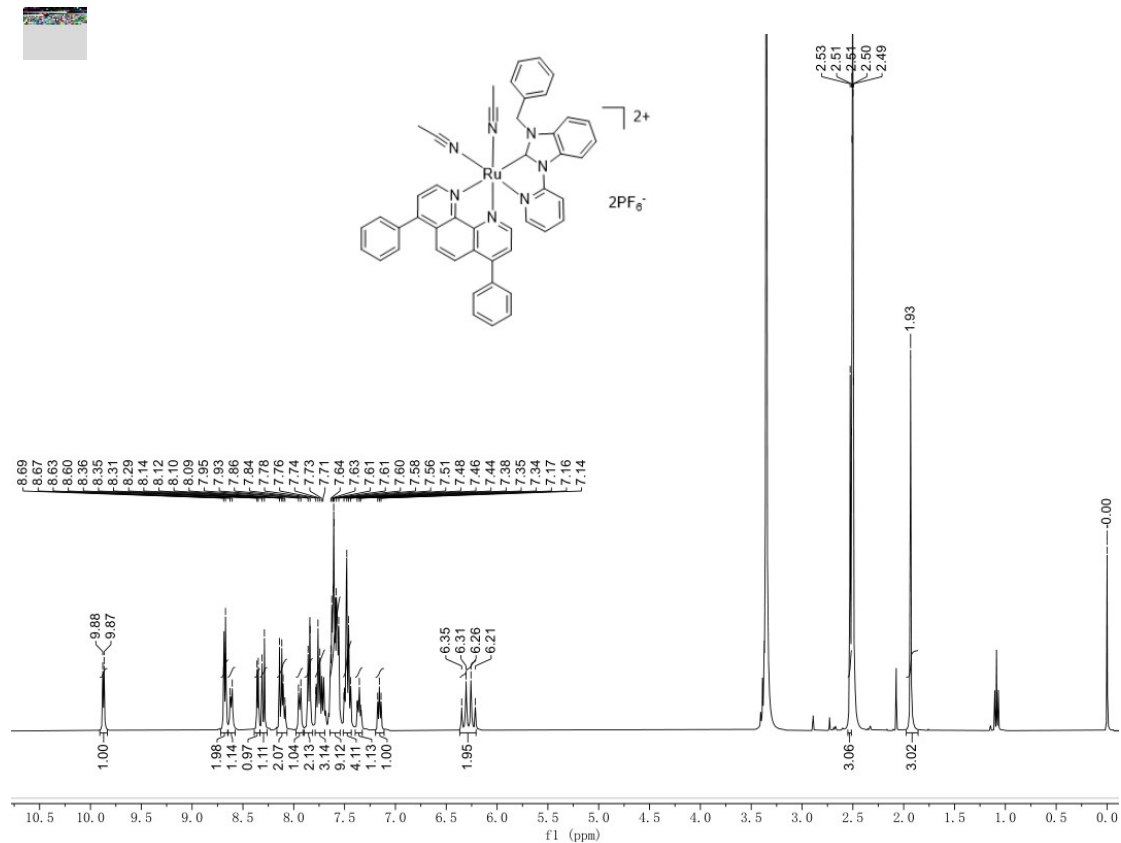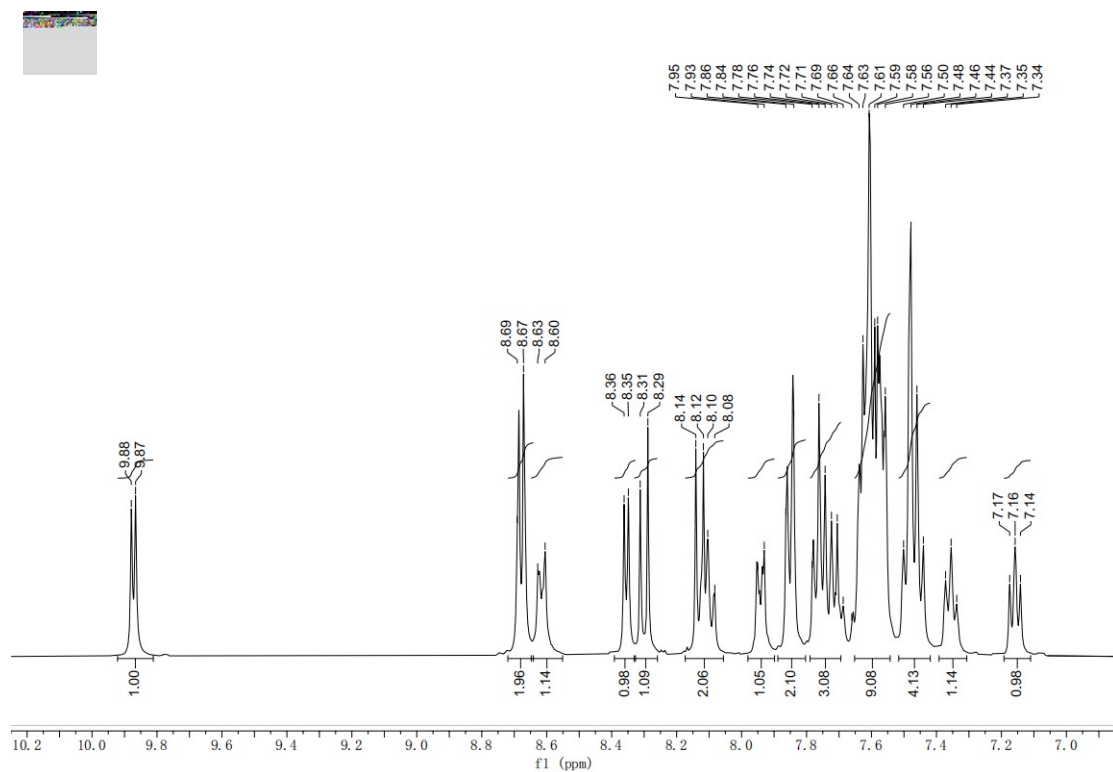

(a) <sup>1</sup>H NMR (DMSO) of **Ru4**, (b) aromatic region <sup>1</sup>H NMR of **Ru4**

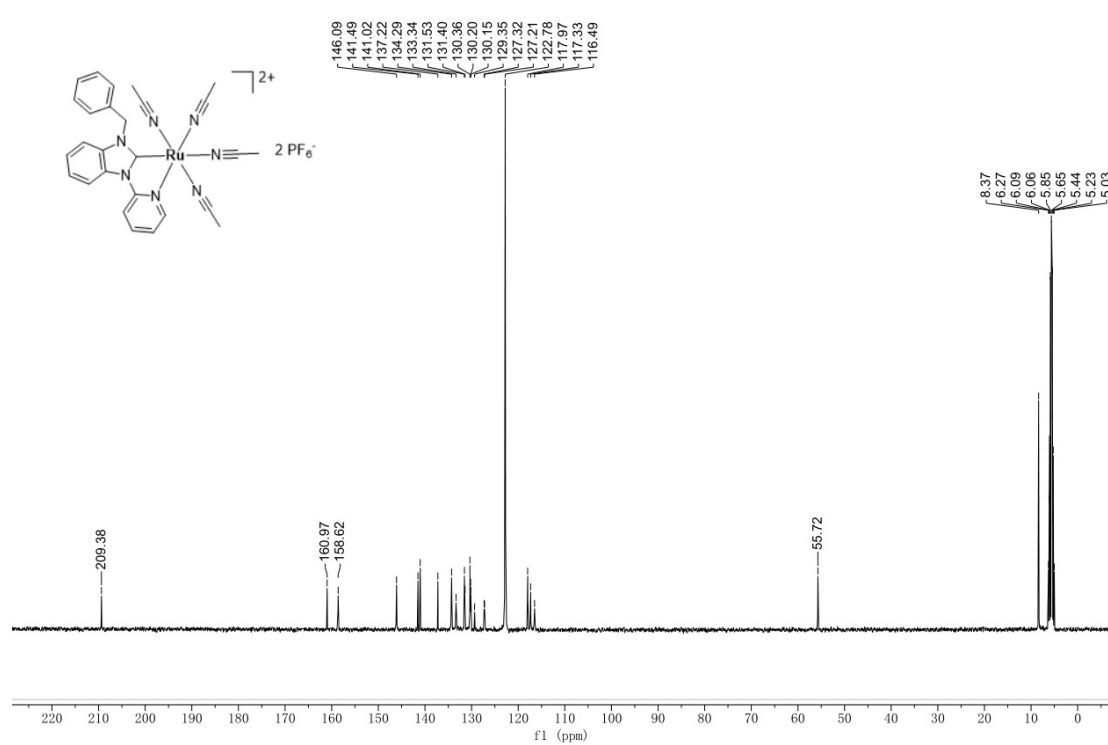

$^{13}\text{C}$  NMR (CD<sub>3</sub>CN) of Ru1

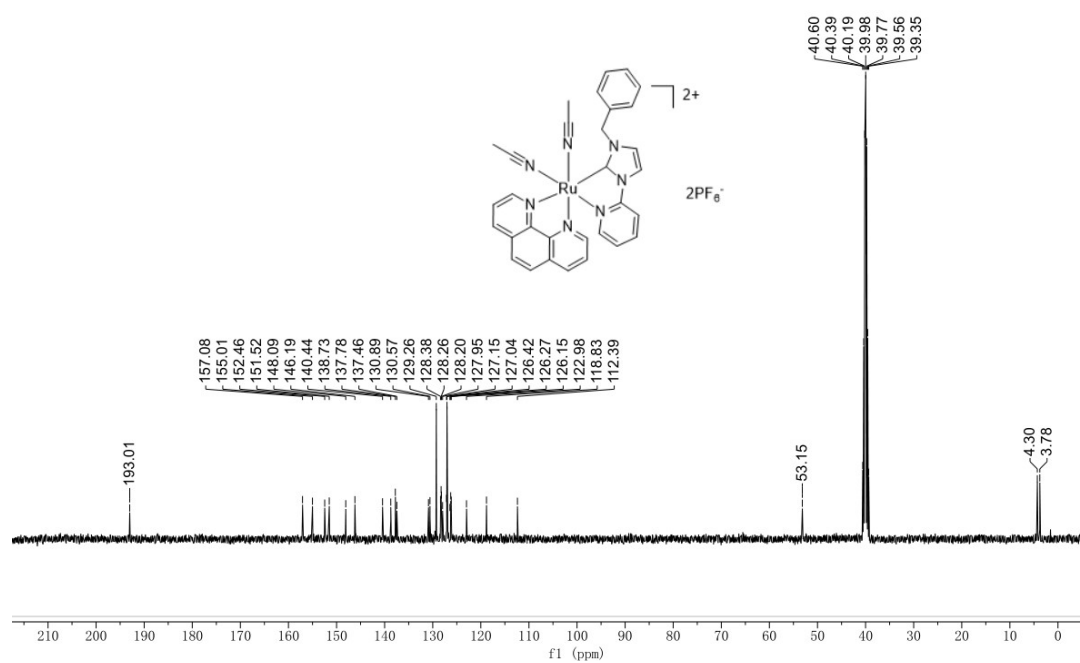

$^{13}\text{C}$  NMR of Ru2 (DMSO)

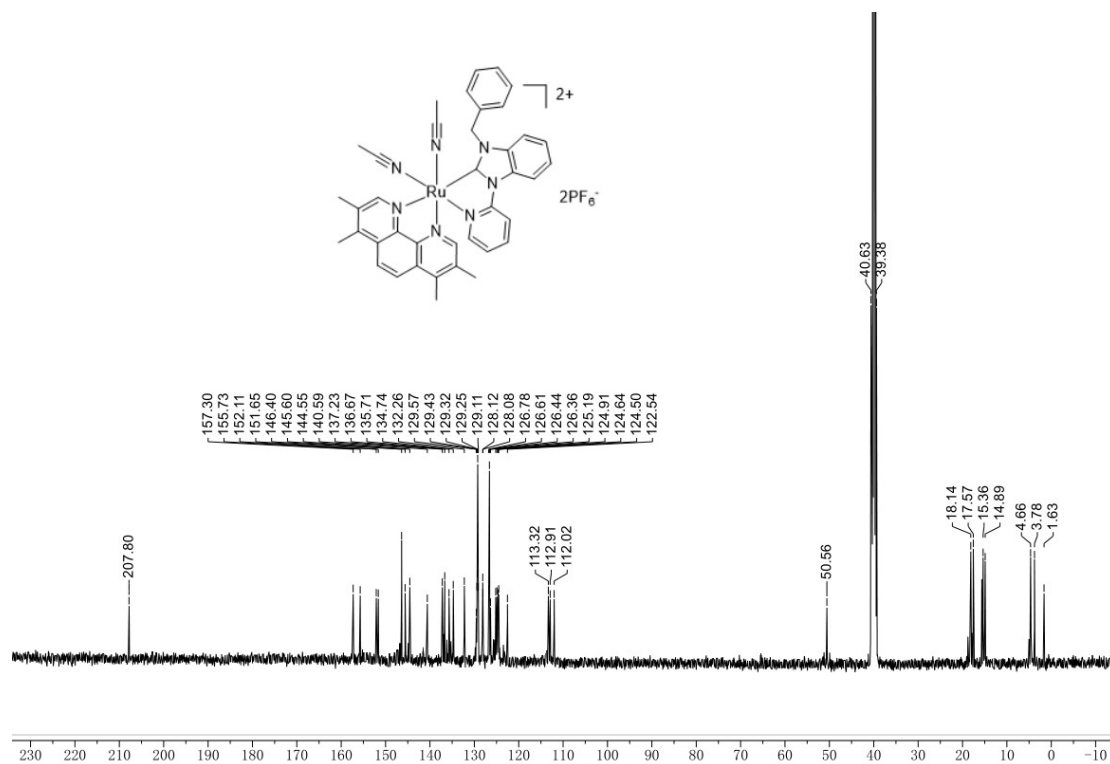

**<sup>13</sup>C NMR of Ru3 (DMSO)**

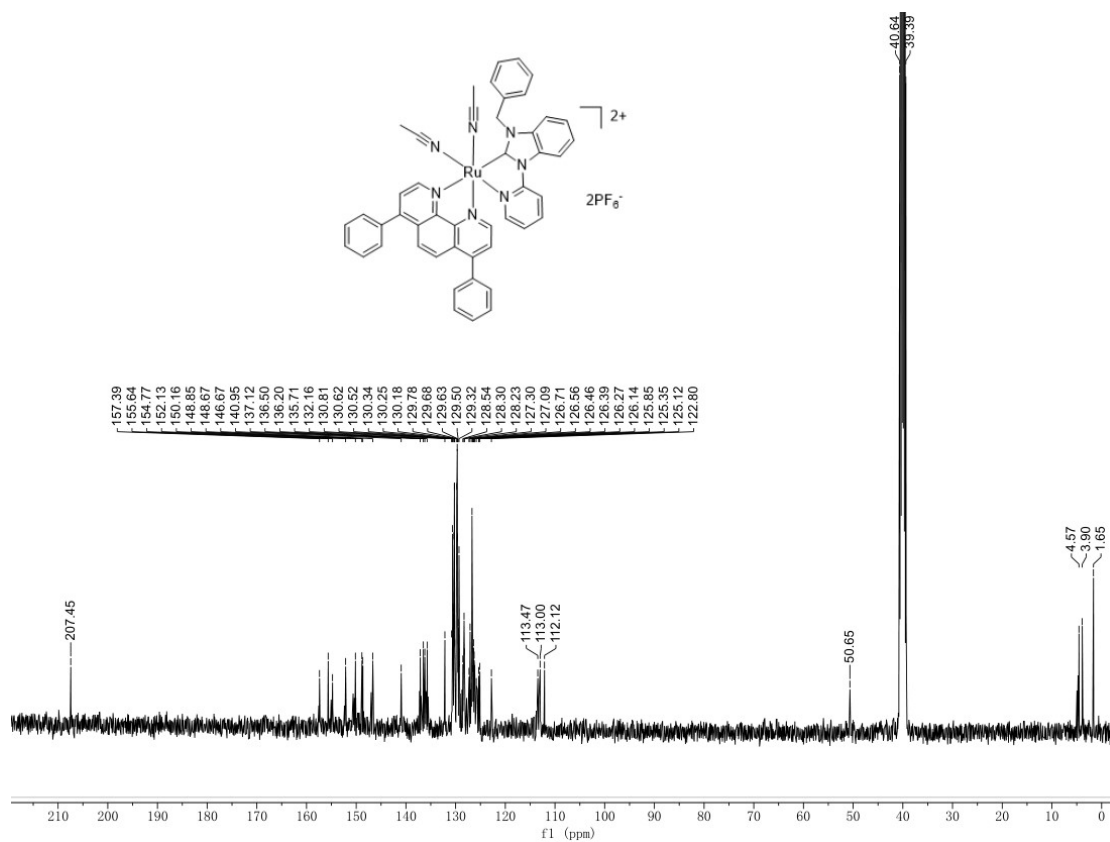

**<sup>13</sup>C NMR of Ru4 (DMSO)**
